# Supplementary material for: Adult palliative care 2004–2030 population study: estimates and projections in Malaysia
Source: PubMed Central journal article supplement — BMJ Support Palliat Care. 2020 Aug 21;12(e1):e129–36. doi: 10.1136/bmjspcare-2020-002283 (PMC9120397; doi:10.1136/bmjspcare-2020-002283), 2020-08-21
Supplement: bmjspcare-2020-002283supp001.pdf [file bmjspcare-2020-002283supp001.pdf]

## Appendix 1

Conditions to be included or excluded in estimating palliative care needs.

|                                                                                       | ICD-10 code                        | DOSM code*                  |
|---------------------------------------------------------------------------------------|------------------------------------|-----------------------------|
| <b><u>Disease groups to be included in method (i)</u></b>                             |                                    |                             |
| Malignant neoplasm                                                                    | C00-C97                            | 100-169                     |
| Chronic heart disease                                                                 | I00- I52                           | 230-234                     |
| Cerebrovascular disease                                                               | I60-I69                            | 235-236                     |
| Renal disease                                                                         | N17, N18, N28, I12, I13            | 270,272                     |
| Liver disease                                                                         | K70-K77                            | 255                         |
| Respiratory disease                                                                   | J06-J18, J20-J22, J40-J47, J96     | 240,241, 243                |
| Neurodegenerative disease                                                             | G10, G20, G35, G122, G903,<br>G231 | 221,226                     |
| Alzheimer's Disease,<br>dementia, senility                                            | F01, F03, G30, R54                 | 222,294,210                 |
| HIV/AIDS                                                                              | B20-B24                            | 031                         |
| <b><u>All disease groups to be included in methods (ii) except the following:</u></b> |                                    |                             |
| Poisoning                                                                             | S00-T98                            | -                           |
| Injury                                                                                | V01-Y98                            | 300-315,319-<br>320,322,323 |
| Maternal death                                                                        | O00-O99                            | 275                         |

\*In Malaysia, all medically certified deaths are coded with ICD-10 whereas all non-medically certified deaths are assigned codes by the DOSM analysts in accordance to the manual developed by the DOSM. The DOSM codes can be matched to the corresponding ICD-10 codes to allow for a mapping of mortality causes according to the respective categories.
